# Supplementary material for: Perceived Stress, Knowledge, and Preventive Behaviors in Indian versus US-based Participants During COVID-19: A Survey Study
Source: Frontiers journal article supplement (doi:10.3389/fpubh.2021.687864), 2021-09-13
Supplement: Data_Sheet_2.PDF [file Data_Sheet_2.PDF]

|    |                                                                                  |                                                                                                                         |                                                                                                                                                                                                                                                                                                                                                                                                                                                                                                                                                                                                                                                                                                                                                                                                                                                                                                                                                                                                                                      |   |                             |                         |                  |                             |                     |   |                             |                                         |                      |                             |                                          |   |                             |          |            |                             |          |   |                             |                                       |   |                             |                          |   |                             |                               |    |                              |                    |
|----|----------------------------------------------------------------------------------|-------------------------------------------------------------------------------------------------------------------------|--------------------------------------------------------------------------------------------------------------------------------------------------------------------------------------------------------------------------------------------------------------------------------------------------------------------------------------------------------------------------------------------------------------------------------------------------------------------------------------------------------------------------------------------------------------------------------------------------------------------------------------------------------------------------------------------------------------------------------------------------------------------------------------------------------------------------------------------------------------------------------------------------------------------------------------------------------------------------------------------------------------------------------------|---|-----------------------------|-------------------------|------------------|-----------------------------|---------------------|---|-----------------------------|-----------------------------------------|----------------------|-----------------------------|------------------------------------------|---|-----------------------------|----------|------------|-----------------------------|----------|---|-----------------------------|---------------------------------------|---|-----------------------------|--------------------------|---|-----------------------------|-------------------------------|----|------------------------------|--------------------|
| 10 | fm_mem_covid_hospitalized<br>Show the field ONLY if:<br>[fam_mem_covid_dx] = '1' | You or your family member were hospitalized with COVID-19 :                                                             | yesno<br><table border="1"> <tr> <td>1</td> <td>Yes</td> </tr> <tr> <td>0</td> <td>No</td> </tr> </table> Custom alignment: LV                                                                                                                                                                                                                                                                                                                                                                                                                                                                                                                                                                                                                                                                                                                                                                                                                                                                                                       | 1 | Yes                         | 0                       | No               |                             |                     |   |                             |                                         |                      |                             |                                          |   |                             |          |            |                             |          |   |                             |                                       |   |                             |                          |   |                             |                               |    |                              |                    |
| 1  | Yes                                                                              |                                                                                                                         |                                                                                                                                                                                                                                                                                                                                                                                                                                                                                                                                                                                                                                                                                                                                                                                                                                                                                                                                                                                                                                      |   |                             |                         |                  |                             |                     |   |                             |                                         |                      |                             |                                          |   |                             |          |            |                             |          |   |                             |                                       |   |                             |                          |   |                             |                               |    |                              |                    |
| 0  | No                                                                               |                                                                                                                         |                                                                                                                                                                                                                                                                                                                                                                                                                                                                                                                                                                                                                                                                                                                                                                                                                                                                                                                                                                                                                                      |   |                             |                         |                  |                             |                     |   |                             |                                         |                      |                             |                                          |   |                             |          |            |                             |          |   |                             |                                       |   |                             |                          |   |                             |                               |    |                              |                    |
| 11 | covid_follow                                                                     | When did you start following COVID-19 actively ?                                                                        | radio<br><table border="1"> <tr> <td>1</td> <td>December 2019</td> </tr> <tr> <td>2</td> <td>Mid-January 2020</td> </tr> <tr> <td>3</td> <td>End of January 2020</td> </tr> <tr> <td>4</td> <td>Mid-February 2020</td> </tr> <tr> <td>5</td> <td>End of February 2020</td> </tr> <tr> <td>6</td> <td>Mid-March 2020</td> </tr> <tr> <td>7</td> <td>End of March 2020</td> </tr> <tr> <td>8</td> <td>April 2020</td> </tr> </table> Custom alignment: LH                                                                                                                                                                                                                                                                                                                                                                                                                                                                                                                                                                              | 1 | December 2019               | 2                       | Mid-January 2020 | 3                           | End of January 2020 | 4 | Mid-February 2020           | 5                                       | End of February 2020 | 6                           | Mid-March 2020                           | 7 | End of March 2020           | 8        | April 2020 |                             |          |   |                             |                                       |   |                             |                          |   |                             |                               |    |                              |                    |
| 1  | December 2019                                                                    |                                                                                                                         |                                                                                                                                                                                                                                                                                                                                                                                                                                                                                                                                                                                                                                                                                                                                                                                                                                                                                                                                                                                                                                      |   |                             |                         |                  |                             |                     |   |                             |                                         |                      |                             |                                          |   |                             |          |            |                             |          |   |                             |                                       |   |                             |                          |   |                             |                               |    |                              |                    |
| 2  | Mid-January 2020                                                                 |                                                                                                                         |                                                                                                                                                                                                                                                                                                                                                                                                                                                                                                                                                                                                                                                                                                                                                                                                                                                                                                                                                                                                                                      |   |                             |                         |                  |                             |                     |   |                             |                                         |                      |                             |                                          |   |                             |          |            |                             |          |   |                             |                                       |   |                             |                          |   |                             |                               |    |                              |                    |
| 3  | End of January 2020                                                              |                                                                                                                         |                                                                                                                                                                                                                                                                                                                                                                                                                                                                                                                                                                                                                                                                                                                                                                                                                                                                                                                                                                                                                                      |   |                             |                         |                  |                             |                     |   |                             |                                         |                      |                             |                                          |   |                             |          |            |                             |          |   |                             |                                       |   |                             |                          |   |                             |                               |    |                              |                    |
| 4  | Mid-February 2020                                                                |                                                                                                                         |                                                                                                                                                                                                                                                                                                                                                                                                                                                                                                                                                                                                                                                                                                                                                                                                                                                                                                                                                                                                                                      |   |                             |                         |                  |                             |                     |   |                             |                                         |                      |                             |                                          |   |                             |          |            |                             |          |   |                             |                                       |   |                             |                          |   |                             |                               |    |                              |                    |
| 5  | End of February 2020                                                             |                                                                                                                         |                                                                                                                                                                                                                                                                                                                                                                                                                                                                                                                                                                                                                                                                                                                                                                                                                                                                                                                                                                                                                                      |   |                             |                         |                  |                             |                     |   |                             |                                         |                      |                             |                                          |   |                             |          |            |                             |          |   |                             |                                       |   |                             |                          |   |                             |                               |    |                              |                    |
| 6  | Mid-March 2020                                                                   |                                                                                                                         |                                                                                                                                                                                                                                                                                                                                                                                                                                                                                                                                                                                                                                                                                                                                                                                                                                                                                                                                                                                                                                      |   |                             |                         |                  |                             |                     |   |                             |                                         |                      |                             |                                          |   |                             |          |            |                             |          |   |                             |                                       |   |                             |                          |   |                             |                               |    |                              |                    |
| 7  | End of March 2020                                                                |                                                                                                                         |                                                                                                                                                                                                                                                                                                                                                                                                                                                                                                                                                                                                                                                                                                                                                                                                                                                                                                                                                                                                                                      |   |                             |                         |                  |                             |                     |   |                             |                                         |                      |                             |                                          |   |                             |          |            |                             |          |   |                             |                                       |   |                             |                          |   |                             |                               |    |                              |                    |
| 8  | April 2020                                                                       |                                                                                                                         |                                                                                                                                                                                                                                                                                                                                                                                                                                                                                                                                                                                                                                                                                                                                                                                                                                                                                                                                                                                                                                      |   |                             |                         |                  |                             |                     |   |                             |                                         |                      |                             |                                          |   |                             |          |            |                             |          |   |                             |                                       |   |                             |                          |   |                             |                               |    |                              |                    |
| 12 | covid_information_source                                                         | Which sources do you follow for COVID-19 updates ? (CHECK ALL THAT APPLY)                                               | checkbox<br><table border="1"> <tr> <td>1</td> <td>covid_information_source__1</td> <td>Television news channel</td> </tr> <tr> <td>2</td> <td>covid_information_source__2</td> <td>Friends and family</td> </tr> <tr> <td>3</td> <td>covid_information_source__3</td> <td>World health organization (WHO) website</td> </tr> <tr> <td>4</td> <td>covid_information_source__4</td> <td>CDC (center for disease control) website</td> </tr> <tr> <td>5</td> <td>covid_information_source__5</td> <td>Facebook</td> </tr> <tr> <td>6</td> <td>covid_information_source__6</td> <td>WhatsApp</td> </tr> <tr> <td>7</td> <td>covid_information_source__7</td> <td>City, state or other official website</td> </tr> <tr> <td>8</td> <td>covid_information_source__8</td> <td>National health websites</td> </tr> <tr> <td>9</td> <td>covid_information_source__9</td> <td>Your doctor or local hospital</td> </tr> <tr> <td>10</td> <td>covid_information_source__10</td> <td>Scientific journal</td> </tr> </table> Custom alignment: LV | 1 | covid_information_source__1 | Television news channel | 2                | covid_information_source__2 | Friends and family  | 3 | covid_information_source__3 | World health organization (WHO) website | 4                    | covid_information_source__4 | CDC (center for disease control) website | 5 | covid_information_source__5 | Facebook | 6          | covid_information_source__6 | WhatsApp | 7 | covid_information_source__7 | City, state or other official website | 8 | covid_information_source__8 | National health websites | 9 | covid_information_source__9 | Your doctor or local hospital | 10 | covid_information_source__10 | Scientific journal |
| 1  | covid_information_source__1                                                      | Television news channel                                                                                                 |                                                                                                                                                                                                                                                                                                                                                                                                                                                                                                                                                                                                                                                                                                                                                                                                                                                                                                                                                                                                                                      |   |                             |                         |                  |                             |                     |   |                             |                                         |                      |                             |                                          |   |                             |          |            |                             |          |   |                             |                                       |   |                             |                          |   |                             |                               |    |                              |                    |
| 2  | covid_information_source__2                                                      | Friends and family                                                                                                      |                                                                                                                                                                                                                                                                                                                                                                                                                                                                                                                                                                                                                                                                                                                                                                                                                                                                                                                                                                                                                                      |   |                             |                         |                  |                             |                     |   |                             |                                         |                      |                             |                                          |   |                             |          |            |                             |          |   |                             |                                       |   |                             |                          |   |                             |                               |    |                              |                    |
| 3  | covid_information_source__3                                                      | World health organization (WHO) website                                                                                 |                                                                                                                                                                                                                                                                                                                                                                                                                                                                                                                                                                                                                                                                                                                                                                                                                                                                                                                                                                                                                                      |   |                             |                         |                  |                             |                     |   |                             |                                         |                      |                             |                                          |   |                             |          |            |                             |          |   |                             |                                       |   |                             |                          |   |                             |                               |    |                              |                    |
| 4  | covid_information_source__4                                                      | CDC (center for disease control) website                                                                                |                                                                                                                                                                                                                                                                                                                                                                                                                                                                                                                                                                                                                                                                                                                                                                                                                                                                                                                                                                                                                                      |   |                             |                         |                  |                             |                     |   |                             |                                         |                      |                             |                                          |   |                             |          |            |                             |          |   |                             |                                       |   |                             |                          |   |                             |                               |    |                              |                    |
| 5  | covid_information_source__5                                                      | Facebook                                                                                                                |                                                                                                                                                                                                                                                                                                                                                                                                                                                                                                                                                                                                                                                                                                                                                                                                                                                                                                                                                                                                                                      |   |                             |                         |                  |                             |                     |   |                             |                                         |                      |                             |                                          |   |                             |          |            |                             |          |   |                             |                                       |   |                             |                          |   |                             |                               |    |                              |                    |
| 6  | covid_information_source__6                                                      | WhatsApp                                                                                                                |                                                                                                                                                                                                                                                                                                                                                                                                                                                                                                                                                                                                                                                                                                                                                                                                                                                                                                                                                                                                                                      |   |                             |                         |                  |                             |                     |   |                             |                                         |                      |                             |                                          |   |                             |          |            |                             |          |   |                             |                                       |   |                             |                          |   |                             |                               |    |                              |                    |
| 7  | covid_information_source__7                                                      | City, state or other official website                                                                                   |                                                                                                                                                                                                                                                                                                                                                                                                                                                                                                                                                                                                                                                                                                                                                                                                                                                                                                                                                                                                                                      |   |                             |                         |                  |                             |                     |   |                             |                                         |                      |                             |                                          |   |                             |          |            |                             |          |   |                             |                                       |   |                             |                          |   |                             |                               |    |                              |                    |
| 8  | covid_information_source__8                                                      | National health websites                                                                                                |                                                                                                                                                                                                                                                                                                                                                                                                                                                                                                                                                                                                                                                                                                                                                                                                                                                                                                                                                                                                                                      |   |                             |                         |                  |                             |                     |   |                             |                                         |                      |                             |                                          |   |                             |          |            |                             |          |   |                             |                                       |   |                             |                          |   |                             |                               |    |                              |                    |
| 9  | covid_information_source__9                                                      | Your doctor or local hospital                                                                                           |                                                                                                                                                                                                                                                                                                                                                                                                                                                                                                                                                                                                                                                                                                                                                                                                                                                                                                                                                                                                                                      |   |                             |                         |                  |                             |                     |   |                             |                                         |                      |                             |                                          |   |                             |          |            |                             |          |   |                             |                                       |   |                             |                          |   |                             |                               |    |                              |                    |
| 10 | covid_information_source__10                                                     | Scientific journal                                                                                                      |                                                                                                                                                                                                                                                                                                                                                                                                                                                                                                                                                                                                                                                                                                                                                                                                                                                                                                                                                                                                                                      |   |                             |                         |                  |                             |                     |   |                             |                                         |                      |                             |                                          |   |                             |          |            |                             |          |   |                             |                                       |   |                             |                          |   |                             |                               |    |                              |                    |
| 13 | confine                                                                          | Section Header: <i>Stress Related to COVID-19 Pandemic</i><br>Being confined at home with minimal social interaction is | radio (Matrix)<br><table border="1"> <tr> <td>1</td> <td>Very stressful</td> </tr> <tr> <td>2</td> <td>Stressful</td> </tr> <tr> <td>3</td> <td>Sometimes stressful</td> </tr> <tr> <td>4</td> <td>Mostly handled well</td> </tr> <tr> <td>5</td> <td>Not stressful at all</td> </tr> </table> Field Annotation: confine                                                                                                                                                                                                                                                                                                                                                                                                                                                                                                                                                                                                                                                                                                             | 1 | Very stressful              | 2                       | Stressful        | 3                           | Sometimes stressful | 4 | Mostly handled well         | 5                                       | Not stressful at all |                             |                                          |   |                             |          |            |                             |          |   |                             |                                       |   |                             |                          |   |                             |                               |    |                              |                    |
| 1  | Very stressful                                                                   |                                                                                                                         |                                                                                                                                                                                                                                                                                                                                                                                                                                                                                                                                                                                                                                                                                                                                                                                                                                                                                                                                                                                                                                      |   |                             |                         |                  |                             |                     |   |                             |                                         |                      |                             |                                          |   |                             |          |            |                             |          |   |                             |                                       |   |                             |                          |   |                             |                               |    |                              |                    |
| 2  | Stressful                                                                        |                                                                                                                         |                                                                                                                                                                                                                                                                                                                                                                                                                                                                                                                                                                                                                                                                                                                                                                                                                                                                                                                                                                                                                                      |   |                             |                         |                  |                             |                     |   |                             |                                         |                      |                             |                                          |   |                             |          |            |                             |          |   |                             |                                       |   |                             |                          |   |                             |                               |    |                              |                    |
| 3  | Sometimes stressful                                                              |                                                                                                                         |                                                                                                                                                                                                                                                                                                                                                                                                                                                                                                                                                                                                                                                                                                                                                                                                                                                                                                                                                                                                                                      |   |                             |                         |                  |                             |                     |   |                             |                                         |                      |                             |                                          |   |                             |          |            |                             |          |   |                             |                                       |   |                             |                          |   |                             |                               |    |                              |                    |
| 4  | Mostly handled well                                                              |                                                                                                                         |                                                                                                                                                                                                                                                                                                                                                                                                                                                                                                                                                                                                                                                                                                                                                                                                                                                                                                                                                                                                                                      |   |                             |                         |                  |                             |                     |   |                             |                                         |                      |                             |                                          |   |                             |          |            |                             |          |   |                             |                                       |   |                             |                          |   |                             |                               |    |                              |                    |
| 5  | Not stressful at all                                                             |                                                                                                                         |                                                                                                                                                                                                                                                                                                                                                                                                                                                                                                                                                                                                                                                                                                                                                                                                                                                                                                                                                                                                                                      |   |                             |                         |                  |                             |                     |   |                             |                                         |                      |                             |                                          |   |                             |          |            |                             |          |   |                             |                                       |   |                             |                          |   |                             |                               |    |                              |                    |

|    |                      |                                                                               |                                                                                                                                                                                                                                                                                                                |   |                |   |           |   |                     |   |                     |   |                      |
|----|----------------------|-------------------------------------------------------------------------------|----------------------------------------------------------------------------------------------------------------------------------------------------------------------------------------------------------------------------------------------------------------------------------------------------------------|---|----------------|---|-----------|---|---------------------|---|---------------------|---|----------------------|
| 14 | job                  | Job situation or possibility of financial instability is                      | radio (Matrix) <table border="1"> <tr><td>1</td><td>Very stressful</td></tr> <tr><td>2</td><td>Stressful</td></tr> <tr><td>3</td><td>Sometimes stressful</td></tr> <tr><td>4</td><td>Mostly handled well</td></tr> <tr><td>5</td><td>Not stressful at all</td></tr> </table> Field Annotation: job             | 1 | Very stressful | 2 | Stressful | 3 | Sometimes stressful | 4 | Mostly handled well | 5 | Not stressful at all |
| 1  | Very stressful       |                                                                               |                                                                                                                                                                                                                                                                                                                |   |                |   |           |   |                     |   |                     |   |                      |
| 2  | Stressful            |                                                                               |                                                                                                                                                                                                                                                                                                                |   |                |   |           |   |                     |   |                     |   |                      |
| 3  | Sometimes stressful  |                                                                               |                                                                                                                                                                                                                                                                                                                |   |                |   |           |   |                     |   |                     |   |                      |
| 4  | Mostly handled well  |                                                                               |                                                                                                                                                                                                                                                                                                                |   |                |   |           |   |                     |   |                     |   |                      |
| 5  | Not stressful at all |                                                                               |                                                                                                                                                                                                                                                                                                                |   |                |   |           |   |                     |   |                     |   |                      |
| 15 | infection            | The possibility of getting infected with COVID-19 is                          | radio (Matrix) <table border="1"> <tr><td>1</td><td>Very stressful</td></tr> <tr><td>2</td><td>Stressful</td></tr> <tr><td>3</td><td>Sometimes stressful</td></tr> <tr><td>4</td><td>Mostly handled well</td></tr> <tr><td>5</td><td>Not stressful at all</td></tr> </table> Field Annotation: infection       | 1 | Very stressful | 2 | Stressful | 3 | Sometimes stressful | 4 | Mostly handled well | 5 | Not stressful at all |
| 1  | Very stressful       |                                                                               |                                                                                                                                                                                                                                                                                                                |   |                |   |           |   |                     |   |                     |   |                      |
| 2  | Stressful            |                                                                               |                                                                                                                                                                                                                                                                                                                |   |                |   |           |   |                     |   |                     |   |                      |
| 3  | Sometimes stressful  |                                                                               |                                                                                                                                                                                                                                                                                                                |   |                |   |           |   |                     |   |                     |   |                      |
| 4  | Mostly handled well  |                                                                               |                                                                                                                                                                                                                                                                                                                |   |                |   |           |   |                     |   |                     |   |                      |
| 5  | Not stressful at all |                                                                               |                                                                                                                                                                                                                                                                                                                |   |                |   |           |   |                     |   |                     |   |                      |
| 16 | food                 | Possible shortage of food and other essentials in the coming months           | radio (Matrix) <table border="1"> <tr><td>1</td><td>Very stressful</td></tr> <tr><td>2</td><td>Stressful</td></tr> <tr><td>3</td><td>Sometimes stressful</td></tr> <tr><td>4</td><td>Mostly handled well</td></tr> <tr><td>5</td><td>Not stressful at all</td></tr> </table> Field Annotation: food            | 1 | Very stressful | 2 | Stressful | 3 | Sometimes stressful | 4 | Mostly handled well | 5 | Not stressful at all |
| 1  | Very stressful       |                                                                               |                                                                                                                                                                                                                                                                                                                |   |                |   |           |   |                     |   |                     |   |                      |
| 2  | Stressful            |                                                                               |                                                                                                                                                                                                                                                                                                                |   |                |   |           |   |                     |   |                     |   |                      |
| 3  | Sometimes stressful  |                                                                               |                                                                                                                                                                                                                                                                                                                |   |                |   |           |   |                     |   |                     |   |                      |
| 4  | Mostly handled well  |                                                                               |                                                                                                                                                                                                                                                                                                                |   |                |   |           |   |                     |   |                     |   |                      |
| 5  | Not stressful at all |                                                                               |                                                                                                                                                                                                                                                                                                                |   |                |   |           |   |                     |   |                     |   |                      |
| 17 | death                | One of your family members is at risk of serious complication due to COVID-19 | radio (Matrix) <table border="1"> <tr><td>1</td><td>Very stressful</td></tr> <tr><td>2</td><td>Stressful</td></tr> <tr><td>3</td><td>Sometimes stressful</td></tr> <tr><td>4</td><td>Mostly handled well</td></tr> <tr><td>5</td><td>Not stressful at all</td></tr> </table> Field Annotation: death           | 1 | Very stressful | 2 | Stressful | 3 | Sometimes stressful | 4 | Mostly handled well | 5 | Not stressful at all |
| 1  | Very stressful       |                                                                               |                                                                                                                                                                                                                                                                                                                |   |                |   |           |   |                     |   |                     |   |                      |
| 2  | Stressful            |                                                                               |                                                                                                                                                                                                                                                                                                                |   |                |   |           |   |                     |   |                     |   |                      |
| 3  | Sometimes stressful  |                                                                               |                                                                                                                                                                                                                                                                                                                |   |                |   |           |   |                     |   |                     |   |                      |
| 4  | Mostly handled well  |                                                                               |                                                                                                                                                                                                                                                                                                                |   |                |   |           |   |                     |   |                     |   |                      |
| 5  | Not stressful at all |                                                                               |                                                                                                                                                                                                                                                                                                                |   |                |   |           |   |                     |   |                     |   |                      |
| 18 | hospital_access      | Lack of access to a good medical facility                                     | radio (Matrix) <table border="1"> <tr><td>1</td><td>Very stressful</td></tr> <tr><td>2</td><td>Stressful</td></tr> <tr><td>3</td><td>Sometimes stressful</td></tr> <tr><td>4</td><td>Mostly handled well</td></tr> <tr><td>5</td><td>Not stressful at all</td></tr> </table> Field Annotation: hospital_access | 1 | Very stressful | 2 | Stressful | 3 | Sometimes stressful | 4 | Mostly handled well | 5 | Not stressful at all |
| 1  | Very stressful       |                                                                               |                                                                                                                                                                                                                                                                                                                |   |                |   |           |   |                     |   |                     |   |                      |
| 2  | Stressful            |                                                                               |                                                                                                                                                                                                                                                                                                                |   |                |   |           |   |                     |   |                     |   |                      |
| 3  | Sometimes stressful  |                                                                               |                                                                                                                                                                                                                                                                                                                |   |                |   |           |   |                     |   |                     |   |                      |
| 4  | Mostly handled well  |                                                                               |                                                                                                                                                                                                                                                                                                                |   |                |   |           |   |                     |   |                     |   |                      |
| 5  | Not stressful at all |                                                                               |                                                                                                                                                                                                                                                                                                                |   |                |   |           |   |                     |   |                     |   |                      |
| 19 | covid_state          | Situation of COVID-19 at your state                                           | radio (Matrix) <table border="1"> <tr><td>1</td><td>Very stressful</td></tr> <tr><td>2</td><td>Stressful</td></tr> <tr><td>3</td><td>Sometimes stressful</td></tr> <tr><td>4</td><td>Mostly handled well</td></tr> <tr><td>5</td><td>Not stressful at all</td></tr> </table> Field Annotation: COVID_state     | 1 | Very stressful | 2 | Stressful | 3 | Sometimes stressful | 4 | Mostly handled well | 5 | Not stressful at all |
| 1  | Very stressful       |                                                                               |                                                                                                                                                                                                                                                                                                                |   |                |   |           |   |                     |   |                     |   |                      |
| 2  | Stressful            |                                                                               |                                                                                                                                                                                                                                                                                                                |   |                |   |           |   |                     |   |                     |   |                      |
| 3  | Sometimes stressful  |                                                                               |                                                                                                                                                                                                                                                                                                                |   |                |   |           |   |                     |   |                     |   |                      |
| 4  | Mostly handled well  |                                                                               |                                                                                                                                                                                                                                                                                                                |   |                |   |           |   |                     |   |                     |   |                      |
| 5  | Not stressful at all |                                                                               |                                                                                                                                                                                                                                                                                                                |   |                |   |           |   |                     |   |                     |   |                      |
