# Supplementary material for: Perceived Stress, Knowledge, and Preventive Behaviors in Indian versus US-based Participants During COVID-19: A Survey Study
Source: Frontiers journal article supplement (doi:10.3389/fpubh.2021.687864), 2021-09-13
Supplement: Data_Sheet_3.PDF [file Data_Sheet_3.PDF]

|                                                                                                                                                                                                 |                                |                                                                                                                         |                                                                                                                                                                                                                                                                               |   |                |   |            |   |          |   |          |   |                   |
|-------------------------------------------------------------------------------------------------------------------------------------------------------------------------------------------------|--------------------------------|-------------------------------------------------------------------------------------------------------------------------|-------------------------------------------------------------------------------------------------------------------------------------------------------------------------------------------------------------------------------------------------------------------------------|---|----------------|---|------------|---|----------|---|----------|---|-------------------|
| 26                                                                                                                                                                                              | second_wave                    | Reopening would lead to a second spike of COVID-19 cases                                                                | radio (Matrix) <table border="1"> <tr><td>1</td><td>Strongly agree</td></tr> <tr><td>2</td><td>Agree</td></tr> <tr><td>3</td><td>Neutral</td></tr> <tr><td>4</td><td>Disagree</td></tr> <tr><td>5</td><td>Strongly disagree</td></tr> </table> Field Annotation: second spike | 1 | Strongly agree | 2 | Agree      | 3 | Neutral  | 4 | Disagree | 5 | Strongly disagree |
| 1                                                                                                                                                                                               | Strongly agree                 |                                                                                                                         |                                                                                                                                                                                                                                                                               |   |                |   |            |   |          |   |          |   |                   |
| 2                                                                                                                                                                                               | Agree                          |                                                                                                                         |                                                                                                                                                                                                                                                                               |   |                |   |            |   |          |   |          |   |                   |
| 3                                                                                                                                                                                               | Neutral                        |                                                                                                                         |                                                                                                                                                                                                                                                                               |   |                |   |            |   |          |   |          |   |                   |
| 4                                                                                                                                                                                               | Disagree                       |                                                                                                                         |                                                                                                                                                                                                                                                                               |   |                |   |            |   |          |   |          |   |                   |
| 5                                                                                                                                                                                               | Strongly disagree              |                                                                                                                         |                                                                                                                                                                                                                                                                               |   |                |   |            |   |          |   |          |   |                   |
| 27                                                                                                                                                                                              | number                         | Section Header: <i>COVID cases</i><br>Actual number of COVID-19 cases are much higher than the number of reported cases | radio (Matrix) <table border="1"> <tr><td>1</td><td>Strongly agree</td></tr> <tr><td>2</td><td>Agree</td></tr> <tr><td>3</td><td>Neutral</td></tr> <tr><td>4</td><td>Disagree</td></tr> <tr><td>5</td><td>Strongly disagree</td></tr> </table> Field Annotation: number       | 1 | Strongly agree | 2 | Agree      | 3 | Neutral  | 4 | Disagree | 5 | Strongly disagree |
| 1                                                                                                                                                                                               | Strongly agree                 |                                                                                                                         |                                                                                                                                                                                                                                                                               |   |                |   |            |   |          |   |          |   |                   |
| 2                                                                                                                                                                                               | Agree                          |                                                                                                                         |                                                                                                                                                                                                                                                                               |   |                |   |            |   |          |   |          |   |                   |
| 3                                                                                                                                                                                               | Neutral                        |                                                                                                                         |                                                                                                                                                                                                                                                                               |   |                |   |            |   |          |   |          |   |                   |
| 4                                                                                                                                                                                               | Disagree                       |                                                                                                                         |                                                                                                                                                                                                                                                                               |   |                |   |            |   |          |   |          |   |                   |
| 5                                                                                                                                                                                               | Strongly disagree              |                                                                                                                         |                                                                                                                                                                                                                                                                               |   |                |   |            |   |          |   |          |   |                   |
| 28                                                                                                                                                                                              | state                          | The situation of COVID-19 in your state is/was concerning                                                               | radio (Matrix) <table border="1"> <tr><td>1</td><td>Strongly agree</td></tr> <tr><td>2</td><td>Agree</td></tr> <tr><td>3</td><td>Neutral</td></tr> <tr><td>4</td><td>Disagree</td></tr> <tr><td>5</td><td>Strongly disagree</td></tr> </table> Field Annotation: state        | 1 | Strongly agree | 2 | Agree      | 3 | Neutral  | 4 | Disagree | 5 | Strongly disagree |
| 1                                                                                                                                                                                               | Strongly agree                 |                                                                                                                         |                                                                                                                                                                                                                                                                               |   |                |   |            |   |          |   |          |   |                   |
| 2                                                                                                                                                                                               | Agree                          |                                                                                                                         |                                                                                                                                                                                                                                                                               |   |                |   |            |   |          |   |          |   |                   |
| 3                                                                                                                                                                                               | Neutral                        |                                                                                                                         |                                                                                                                                                                                                                                                                               |   |                |   |            |   |          |   |          |   |                   |
| 4                                                                                                                                                                                               | Disagree                       |                                                                                                                         |                                                                                                                                                                                                                                                                               |   |                |   |            |   |          |   |          |   |                   |
| 5                                                                                                                                                                                               | Strongly disagree              |                                                                                                                         |                                                                                                                                                                                                                                                                               |   |                |   |            |   |          |   |          |   |                   |
| 29                                                                                                                                                                                              | belief                         | COVID-19 can be controlled by the end of 2020                                                                           | radio (Matrix) <table border="1"> <tr><td>1</td><td>Strongly agree</td></tr> <tr><td>2</td><td>Agree</td></tr> <tr><td>3</td><td>Neutral</td></tr> <tr><td>4</td><td>Disagree</td></tr> <tr><td>5</td><td>Strongly disagree</td></tr> </table> Field Annotation: belief       | 1 | Strongly agree | 2 | Agree      | 3 | Neutral  | 4 | Disagree | 5 | Strongly disagree |
| 1                                                                                                                                                                                               | Strongly agree                 |                                                                                                                         |                                                                                                                                                                                                                                                                               |   |                |   |            |   |          |   |          |   |                   |
| 2                                                                                                                                                                                               | Agree                          |                                                                                                                         |                                                                                                                                                                                                                                                                               |   |                |   |            |   |          |   |          |   |                   |
| 3                                                                                                                                                                                               | Neutral                        |                                                                                                                         |                                                                                                                                                                                                                                                                               |   |                |   |            |   |          |   |          |   |                   |
| 4                                                                                                                                                                                               | Disagree                       |                                                                                                                         |                                                                                                                                                                                                                                                                               |   |                |   |            |   |          |   |          |   |                   |
| 5                                                                                                                                                                                               | Strongly disagree              |                                                                                                                         |                                                                                                                                                                                                                                                                               |   |                |   |            |   |          |   |          |   |                   |
| 30                                                                                                                                                                                              | concern_about_covid19_complete | Section Header: <i>Form Status</i><br>Complete?                                                                         | dropdown <table border="1"> <tr><td>0</td><td>Incomplete</td></tr> <tr><td>1</td><td>Unverified</td></tr> <tr><td>2</td><td>Complete</td></tr> </table>                                                                                                                       | 0 | Incomplete     | 1 | Unverified | 2 | Complete |   |          |   |                   |
| 0                                                                                                                                                                                               | Incomplete                     |                                                                                                                         |                                                                                                                                                                                                                                                                               |   |                |   |            |   |          |   |          |   |                   |
| 1                                                                                                                                                                                               | Unverified                     |                                                                                                                         |                                                                                                                                                                                                                                                                               |   |                |   |            |   |          |   |          |   |                   |
| 2                                                                                                                                                                                               | Complete                       |                                                                                                                         |                                                                                                                                                                                                                                                                               |   |                |   |            |   |          |   |          |   |                   |
| Instrument: <b>Knowledge On Covid19</b> (knowledge_on_covid19)  Enabled as survey <a href="#">^ Collapse</a> |                                |                                                                                                                         |                                                                                                                                                                                                                                                                               |   |                |   |            |   |          |   |          |   |                   |
| 31                                                                                                                                                                                              | age                            | Section Header: <i>Who are at high risk for serious coronavirus infection ?</i><br>Elderly people (age >60 years)       | radio (Matrix) <table border="1"> <tr><td>1</td><td>Yes</td></tr> <tr><td>0</td><td>No</td></tr> </table> Field Annotation: age                                                                                                                                               | 1 | Yes            | 0 | No         |   |          |   |          |   |                   |
| 1                                                                                                                                                                                               | Yes                            |                                                                                                                         |                                                                                                                                                                                                                                                                               |   |                |   |            |   |          |   |          |   |                   |
| 0                                                                                                                                                                                               | No                             |                                                                                                                         |                                                                                                                                                                                                                                                                               |   |                |   |            |   |          |   |          |   |                   |
| 32                                                                                                                                                                                              | child                          | Children (0-5 years)                                                                                                    | radio (Matrix) <table border="1"> <tr><td>1</td><td>Yes</td></tr> <tr><td>0</td><td>No</td></tr> </table> Field Annotation: child                                                                                                                                             | 1 | Yes            | 0 | No         |   |          |   |          |   |                   |
| 1                                                                                                                                                                                               | Yes                            |                                                                                                                         |                                                                                                                                                                                                                                                                               |   |                |   |            |   |          |   |          |   |                   |
| 0                                                                                                                                                                                               | No                             |                                                                                                                         |                                                                                                                                                                                                                                                                               |   |                |   |            |   |          |   |          |   |                   |
| 33                                                                                                                                                                                              | smoke                          | Smokers                                                                                                                 | radio (Matrix) <table border="1"> <tr><td>1</td><td>Yes</td></tr> <tr><td>0</td><td>No</td></tr> </table> Field Annotation: smoke                                                                                                                                             | 1 | Yes            | 0 | No         |   |          |   |          |   |                   |
| 1                                                                                                                                                                                               | Yes                            |                                                                                                                         |                                                                                                                                                                                                                                                                               |   |                |   |            |   |          |   |          |   |                   |
| 0                                                                                                                                                                                               | No                             |                                                                                                                         |                                                                                                                                                                                                                                                                               |   |                |   |            |   |          |   |          |   |                   |

|    |            |                                                                                             |                                                                                                                                |   |     |   |    |
|----|------------|---------------------------------------------------------------------------------------------|--------------------------------------------------------------------------------------------------------------------------------|---|-----|---|----|
| 34 | dm         | Diabetic patients                                                                           | radio (Matrix)<br><table><tr><td>1</td><td>Yes</td></tr><tr><td>0</td><td>No</td></tr></table><br>Field Annotation: DM         | 1 | Yes | 0 | No |
| 1  | Yes        |                                                                                             |                                                                                                                                |   |     |   |    |
| 0  | No         |                                                                                             |                                                                                                                                |   |     |   |    |
| 35 | immune     | People without ability to fight infection                                                   | radio (Matrix)<br><table><tr><td>1</td><td>Yes</td></tr><tr><td>0</td><td>No</td></tr></table><br>Field Annotation: Immune     | 1 | Yes | 0 | No |
| 1  | Yes        |                                                                                             |                                                                                                                                |   |     |   |    |
| 0  | No         |                                                                                             |                                                                                                                                |   |     |   |    |
| 36 | pregnant   | Pregnant women                                                                              | radio (Matrix)<br><table><tr><td>1</td><td>Yes</td></tr><tr><td>0</td><td>No</td></tr></table><br>Field Annotation: pregnant   | 1 | Yes | 0 | No |
| 1  | Yes        |                                                                                             |                                                                                                                                |   |     |   |    |
| 0  | No         |                                                                                             |                                                                                                                                |   |     |   |    |
| 37 | hosp_rate  | Section Header: <i>Knowledge on COVID-19</i><br>Most COVID-19 patients need hospitalization | radio (Matrix)<br><table><tr><td>1</td><td>Yes</td></tr><tr><td>0</td><td>No</td></tr></table><br>Field Annotation: most       | 1 | Yes | 0 | No |
| 1  | Yes        |                                                                                             |                                                                                                                                |   |     |   |    |
| 0  | No         |                                                                                             |                                                                                                                                |   |     |   |    |
| 38 | death_rate | One in five COVID-19 patients die                                                           | radio (Matrix)<br><table><tr><td>1</td><td>Yes</td></tr><tr><td>0</td><td>No</td></tr></table><br>Field Annotation: Die        | 1 | Yes | 0 | No |
| 1  | Yes        |                                                                                             |                                                                                                                                |   |     |   |    |
| 0  | No         |                                                                                             |                                                                                                                                |   |     |   |    |
| 39 | incubation | It takes 2-3 weeks to have disease symptoms after getting coronavirus                       | radio (Matrix)<br><table><tr><td>1</td><td>Yes</td></tr><tr><td>0</td><td>No</td></tr></table><br>Field Annotation: incubation | 1 | Yes | 0 | No |
| 1  | Yes        |                                                                                             |                                                                                                                                |   |     |   |    |
| 0  | No         |                                                                                             |                                                                                                                                |   |     |   |    |
| 40 | corona     | Before COVID-19, we did not know that coronavirus can affect human                          | radio (Matrix)<br><table><tr><td>1</td><td>Yes</td></tr><tr><td>0</td><td>No</td></tr></table><br>Field Annotation: corona     | 1 | Yes | 0 | No |
| 1  | Yes        |                                                                                             |                                                                                                                                |   |     |   |    |
| 0  | No         |                                                                                             |                                                                                                                                |   |     |   |    |
| 41 | animal     | We can get COVID-19 from animals                                                            | radio (Matrix)<br><table><tr><td>1</td><td>Yes</td></tr><tr><td>0</td><td>No</td></tr></table><br>Field Annotation: Animal     | 1 | Yes | 0 | No |
| 1  | Yes        |                                                                                             |                                                                                                                                |   |     |   |    |
| 0  | No         |                                                                                             |                                                                                                                                |   |     |   |    |
| 42 | screening  | Every person in the community should be tested for COVID-19                                 | radio (Matrix)<br><table><tr><td>1</td><td>Yes</td></tr><tr><td>0</td><td>No</td></tr></table><br>Field Annotation: test       | 1 | Yes | 0 | No |
| 1  | Yes        |                                                                                             |                                                                                                                                |   |     |   |    |
| 0  | No         |                                                                                             |                                                                                                                                |   |     |   |    |
| 43 | hand_wash  | Section Header: <i>Which of the following helps to prevent COVID-19 ?</i><br>Hand washing   | radio (Matrix)<br><table><tr><td>1</td><td>Yes</td></tr><tr><td>0</td><td>No</td></tr></table><br>Field Annotation: prevent    | 1 | Yes | 0 | No |
| 1  | Yes        |                                                                                             |                                                                                                                                |   |     |   |    |
| 0  | No         |                                                                                             |                                                                                                                                |   |     |   |    |
| 44 | climate    | Hot and humid climate                                                                       | radio (Matrix)<br><table><tr><td>1</td><td>Yes</td></tr><tr><td>0</td><td>No</td></tr></table><br>Field Annotation: climate    | 1 | Yes | 0 | No |
| 1  | Yes        |                                                                                             |                                                                                                                                |   |     |   |    |
| 0  | No         |                                                                                             |                                                                                                                                |   |     |   |    |

|    |                                                           |                                                                      |                                                                                                                                                                                                                                                                                                                                                                                                                      |   |                                                           |                                           |                                                  |                   |                                                                      |   |                        |                     |   |                   |           |   |                   |             |
|----|-----------------------------------------------------------|----------------------------------------------------------------------|----------------------------------------------------------------------------------------------------------------------------------------------------------------------------------------------------------------------------------------------------------------------------------------------------------------------------------------------------------------------------------------------------------------------|---|-----------------------------------------------------------|-------------------------------------------|--------------------------------------------------|-------------------|----------------------------------------------------------------------|---|------------------------|---------------------|---|-------------------|-----------|---|-------------------|-------------|
| 45 | sunlight                                                  | Exposure to bright sunlight                                          | radio (Matrix)<br><table border="1"> <tr> <td>1</td> <td>Yes</td> </tr> <tr> <td>0</td> <td>No</td> </tr> </table> Field Annotation: sunlight                                                                                                                                                                                                                                                                        | 1 | Yes                                                       | 0                                         | No                                               |                   |                                                                      |   |                        |                     |   |                   |           |   |                   |             |
| 1  | Yes                                                       |                                                                      |                                                                                                                                                                                                                                                                                                                                                                                                                      |   |                                                           |                                           |                                                  |                   |                                                                      |   |                        |                     |   |                   |           |   |                   |             |
| 0  | No                                                        |                                                                      |                                                                                                                                                                                                                                                                                                                                                                                                                      |   |                                                           |                                           |                                                  |                   |                                                                      |   |                        |                     |   |                   |           |   |                   |             |
| 46 | nasal_spray                                               | Saline nasal spray                                                   | radio (Matrix)<br><table border="1"> <tr> <td>1</td> <td>Yes</td> </tr> <tr> <td>0</td> <td>No</td> </tr> </table> Field Annotation: nasal spray                                                                                                                                                                                                                                                                     | 1 | Yes                                                       | 0                                         | No                                               |                   |                                                                      |   |                        |                     |   |                   |           |   |                   |             |
| 1  | Yes                                                       |                                                                      |                                                                                                                                                                                                                                                                                                                                                                                                                      |   |                                                           |                                           |                                                  |                   |                                                                      |   |                        |                     |   |                   |           |   |                   |             |
| 0  | No                                                        |                                                                      |                                                                                                                                                                                                                                                                                                                                                                                                                      |   |                                                           |                                           |                                                  |                   |                                                                      |   |                        |                     |   |                   |           |   |                   |             |
| 47 | hot_beverages                                             | Drinking hot beverages or alcohol                                    | radio (Matrix)<br><table border="1"> <tr> <td>1</td> <td>Yes</td> </tr> <tr> <td>0</td> <td>No</td> </tr> </table> Field Annotation: hot beverages                                                                                                                                                                                                                                                                   | 1 | Yes                                                       | 0                                         | No                                               |                   |                                                                      |   |                        |                     |   |                   |           |   |                   |             |
| 1  | Yes                                                       |                                                                      |                                                                                                                                                                                                                                                                                                                                                                                                                      |   |                                                           |                                           |                                                  |                   |                                                                      |   |                        |                     |   |                   |           |   |                   |             |
| 0  | No                                                        |                                                                      |                                                                                                                                                                                                                                                                                                                                                                                                                      |   |                                                           |                                           |                                                  |                   |                                                                      |   |                        |                     |   |                   |           |   |                   |             |
| 48 | hand_sanitize                                             | Hand sanitizer containing alcohol                                    | radio (Matrix)<br><table border="1"> <tr> <td>1</td> <td>Yes</td> </tr> <tr> <td>0</td> <td>No</td> </tr> </table> Field Annotation: Hand sanitize                                                                                                                                                                                                                                                                   | 1 | Yes                                                       | 0                                         | No                                               |                   |                                                                      |   |                        |                     |   |                   |           |   |                   |             |
| 1  | Yes                                                       |                                                                      |                                                                                                                                                                                                                                                                                                                                                                                                                      |   |                                                           |                                           |                                                  |                   |                                                                      |   |                        |                     |   |                   |           |   |                   |             |
| 0  | No                                                        |                                                                      |                                                                                                                                                                                                                                                                                                                                                                                                                      |   |                                                           |                                           |                                                  |                   |                                                                      |   |                        |                     |   |                   |           |   |                   |             |
| 49 | baby_wipes                                                | Baby wipes                                                           | radio (Matrix)<br><table border="1"> <tr> <td>1</td> <td>Yes</td> </tr> <tr> <td>0</td> <td>No</td> </tr> </table> Field Annotation: Baby wipes                                                                                                                                                                                                                                                                      | 1 | Yes                                                       | 0                                         | No                                               |                   |                                                                      |   |                        |                     |   |                   |           |   |                   |             |
| 1  | Yes                                                       |                                                                      |                                                                                                                                                                                                                                                                                                                                                                                                                      |   |                                                           |                                           |                                                  |                   |                                                                      |   |                        |                     |   |                   |           |   |                   |             |
| 0  | No                                                        |                                                                      |                                                                                                                                                                                                                                                                                                                                                                                                                      |   |                                                           |                                           |                                                  |                   |                                                                      |   |                        |                     |   |                   |           |   |                   |             |
| 50 | covid_symptoms                                            | COVID-19 symptoms include (CHECK ALL THAT APPLY) :                   | checkbox<br><table border="1"> <tr> <td>1</td> <td>covid_symptoms__1</td> <td>Fever</td> </tr> <tr> <td>2</td> <td>covid_symptoms__2</td> <td>Cough</td> </tr> <tr> <td>3</td> <td>covid_symptoms__3</td> <td>Shortness of breath</td> </tr> <tr> <td>4</td> <td>covid_symptoms__4</td> <td>Body ache</td> </tr> <tr> <td>5</td> <td>covid_symptoms__5</td> <td>Sore throat</td> </tr> </table> Custom alignment: LV | 1 | covid_symptoms__1                                         | Fever                                     | 2                                                | covid_symptoms__2 | Cough                                                                | 3 | covid_symptoms__3      | Shortness of breath | 4 | covid_symptoms__4 | Body ache | 5 | covid_symptoms__5 | Sore throat |
| 1  | covid_symptoms__1                                         | Fever                                                                |                                                                                                                                                                                                                                                                                                                                                                                                                      |   |                                                           |                                           |                                                  |                   |                                                                      |   |                        |                     |   |                   |           |   |                   |             |
| 2  | covid_symptoms__2                                         | Cough                                                                |                                                                                                                                                                                                                                                                                                                                                                                                                      |   |                                                           |                                           |                                                  |                   |                                                                      |   |                        |                     |   |                   |           |   |                   |             |
| 3  | covid_symptoms__3                                         | Shortness of breath                                                  |                                                                                                                                                                                                                                                                                                                                                                                                                      |   |                                                           |                                           |                                                  |                   |                                                                      |   |                        |                     |   |                   |           |   |                   |             |
| 4  | covid_symptoms__4                                         | Body ache                                                            |                                                                                                                                                                                                                                                                                                                                                                                                                      |   |                                                           |                                           |                                                  |                   |                                                                      |   |                        |                     |   |                   |           |   |                   |             |
| 5  | covid_symptoms__5                                         | Sore throat                                                          |                                                                                                                                                                                                                                                                                                                                                                                                                      |   |                                                           |                                           |                                                  |                   |                                                                      |   |                        |                     |   |                   |           |   |                   |             |
| 51 | vaccine_pcv_flu                                           | Vaccines :                                                           | radio<br><table border="1"> <tr> <td>1</td> <td>Pneumonia vaccine offers some protection against COVID-19</td> </tr> <tr> <td>2</td> <td>Flu shot offers some protection against COVID-19</td> </tr> <tr> <td>3</td> <td>Both 1 and 2 are true</td> </tr> <tr> <td>4</td> <td>Both 1 and 2 are false</td> </tr> </table> Custom alignment: LV                                                                        | 1 | Pneumonia vaccine offers some protection against COVID-19 | 2                                         | Flu shot offers some protection against COVID-19 | 3                 | Both 1 and 2 are true                                                | 4 | Both 1 and 2 are false |                     |   |                   |           |   |                   |             |
| 1  | Pneumonia vaccine offers some protection against COVID-19 |                                                                      |                                                                                                                                                                                                                                                                                                                                                                                                                      |   |                                                           |                                           |                                                  |                   |                                                                      |   |                        |                     |   |                   |           |   |                   |             |
| 2  | Flu shot offers some protection against COVID-19          |                                                                      |                                                                                                                                                                                                                                                                                                                                                                                                                      |   |                                                           |                                           |                                                  |                   |                                                                      |   |                        |                     |   |                   |           |   |                   |             |
| 3  | Both 1 and 2 are true                                     |                                                                      |                                                                                                                                                                                                                                                                                                                                                                                                                      |   |                                                           |                                           |                                                  |                   |                                                                      |   |                        |                     |   |                   |           |   |                   |             |
| 4  | Both 1 and 2 are false                                    |                                                                      |                                                                                                                                                                                                                                                                                                                                                                                                                      |   |                                                           |                                           |                                                  |                   |                                                                      |   |                        |                     |   |                   |           |   |                   |             |
| 52 | mask_gloves                                               | Protective measures (CHECK ALL THAT APPLY) :                         | checkbox<br><table border="1"> <tr> <td>1</td> <td>mask_gloves__1</td> <td>Face-mask prevents the spread of COVID-19</td> </tr> <tr> <td>2</td> <td>mask_gloves__2</td> <td>Rubber gloves should be used while going outside (such as groceries)</td> </tr> </table> Custom alignment: LV                                                                                                                            | 1 | mask_gloves__1                                            | Face-mask prevents the spread of COVID-19 | 2                                                | mask_gloves__2    | Rubber gloves should be used while going outside (such as groceries) |   |                        |                     |   |                   |           |   |                   |             |
| 1  | mask_gloves__1                                            | Face-mask prevents the spread of COVID-19                            |                                                                                                                                                                                                                                                                                                                                                                                                                      |   |                                                           |                                           |                                                  |                   |                                                                      |   |                        |                     |   |                   |           |   |                   |             |
| 2  | mask_gloves__2                                            | Rubber gloves should be used while going outside (such as groceries) |                                                                                                                                                                                                                                                                                                                                                                                                                      |   |                                                           |                                           |                                                  |                   |                                                                      |   |                        |                     |   |                   |           |   |                   |             |

|                                                                                                                                                                                                  |                               |                                                                                                |                                                                                                                                                                                                                                                                                                                                          |   |                |                    |                     |           |                          |   |            |                                |                   |           |          |
|--------------------------------------------------------------------------------------------------------------------------------------------------------------------------------------------------|-------------------------------|------------------------------------------------------------------------------------------------|------------------------------------------------------------------------------------------------------------------------------------------------------------------------------------------------------------------------------------------------------------------------------------------------------------------------------------------|---|----------------|--------------------|---------------------|-----------|--------------------------|---|------------|--------------------------------|-------------------|-----------|----------|
| 53                                                                                                                                                                                               | social_distance_feet          | Social distancing means keeping ____ feet gap between two persons :                            | radio<br><table border="1"> <tr><td>1</td><td>3 feet</td></tr> <tr><td>2</td><td>6 feet</td></tr> <tr><td>3</td><td>10 feet</td></tr> <tr><td>4</td><td>15 feet</td></tr> </table> Custom alignment: LV                                                                                                                                  | 1 | 3 feet         | 2                  | 6 feet              | 3         | 10 feet                  | 4 | 15 feet    |                                |                   |           |          |
| 1                                                                                                                                                                                                | 3 feet                        |                                                                                                |                                                                                                                                                                                                                                                                                                                                          |   |                |                    |                     |           |                          |   |            |                                |                   |           |          |
| 2                                                                                                                                                                                                | 6 feet                        |                                                                                                |                                                                                                                                                                                                                                                                                                                                          |   |                |                    |                     |           |                          |   |            |                                |                   |           |          |
| 3                                                                                                                                                                                                | 10 feet                       |                                                                                                |                                                                                                                                                                                                                                                                                                                                          |   |                |                    |                     |           |                          |   |            |                                |                   |           |          |
| 4                                                                                                                                                                                                | 15 feet                       |                                                                                                |                                                                                                                                                                                                                                                                                                                                          |   |                |                    |                     |           |                          |   |            |                                |                   |           |          |
| 54                                                                                                                                                                                               | isolation                     | If you had contact with a COVID-19 patient, you should be isolated for :                       | radio<br><table border="1"> <tr><td>1</td><td>One week</td></tr> <tr><td>2</td><td>Two weeks</td></tr> <tr><td>3</td><td>Three weeks</td></tr> <tr><td>4</td><td>Four weeks</td></tr> </table> Custom alignment: LV                                                                                                                      | 1 | One week       | 2                  | Two weeks           | 3         | Three weeks              | 4 | Four weeks |                                |                   |           |          |
| 1                                                                                                                                                                                                | One week                      |                                                                                                |                                                                                                                                                                                                                                                                                                                                          |   |                |                    |                     |           |                          |   |            |                                |                   |           |          |
| 2                                                                                                                                                                                                | Two weeks                     |                                                                                                |                                                                                                                                                                                                                                                                                                                                          |   |                |                    |                     |           |                          |   |            |                                |                   |           |          |
| 3                                                                                                                                                                                                | Three weeks                   |                                                                                                |                                                                                                                                                                                                                                                                                                                                          |   |                |                    |                     |           |                          |   |            |                                |                   |           |          |
| 4                                                                                                                                                                                                | Four weeks                    |                                                                                                |                                                                                                                                                                                                                                                                                                                                          |   |                |                    |                     |           |                          |   |            |                                |                   |           |          |
| 55                                                                                                                                                                                               | corona_live                   | Coronavirus can live on a surface for :                                                        | radio<br><table border="1"> <tr><td>1</td><td>Up to 6 hours</td></tr> <tr><td>2</td><td>Few hours to 3 days</td></tr> <tr><td>3</td><td>Up to 14 days</td></tr> </table> Custom alignment: LV                                                                                                                                            | 1 | Up to 6 hours  | 2                  | Few hours to 3 days | 3         | Up to 14 days            |   |            |                                |                   |           |          |
| 1                                                                                                                                                                                                | Up to 6 hours                 |                                                                                                |                                                                                                                                                                                                                                                                                                                                          |   |                |                    |                     |           |                          |   |            |                                |                   |           |          |
| 2                                                                                                                                                                                                | Few hours to 3 days           |                                                                                                |                                                                                                                                                                                                                                                                                                                                          |   |                |                    |                     |           |                          |   |            |                                |                   |           |          |
| 3                                                                                                                                                                                                | Up to 14 days                 |                                                                                                |                                                                                                                                                                                                                                                                                                                                          |   |                |                    |                     |           |                          |   |            |                                |                   |           |          |
| 56                                                                                                                                                                                               | spread                        | COVID-19 usually spreads via (CHECK ALL THAT APPLY) :                                          | checkbox<br><table border="1"> <tr><td>1</td><td>spread__1</td><td>Contact (by touch)</td></tr> <tr><td>2</td><td>spread__2</td><td>Droplet (such as sneeze)</td></tr> <tr><td>3</td><td>spread__3</td><td>Water (drinking water, shower)</td></tr> <tr><td>4</td><td>spread__4</td><td>Wind/air</td></tr> </table> Custom alignment: LV | 1 | spread__1      | Contact (by touch) | 2                   | spread__2 | Droplet (such as sneeze) | 3 | spread__3  | Water (drinking water, shower) | 4                 | spread__4 | Wind/air |
| 1                                                                                                                                                                                                | spread__1                     | Contact (by touch)                                                                             |                                                                                                                                                                                                                                                                                                                                          |   |                |                    |                     |           |                          |   |            |                                |                   |           |          |
| 2                                                                                                                                                                                                | spread__2                     | Droplet (such as sneeze)                                                                       |                                                                                                                                                                                                                                                                                                                                          |   |                |                    |                     |           |                          |   |            |                                |                   |           |          |
| 3                                                                                                                                                                                                | spread__3                     | Water (drinking water, shower)                                                                 |                                                                                                                                                                                                                                                                                                                                          |   |                |                    |                     |           |                          |   |            |                                |                   |           |          |
| 4                                                                                                                                                                                                | spread__4                     | Wind/air                                                                                       |                                                                                                                                                                                                                                                                                                                                          |   |                |                    |                     |           |                          |   |            |                                |                   |           |          |
| 57                                                                                                                                                                                               | knowledge_on_covid19_complete | Section Header: <i>Form Status</i><br>Complete?                                                | dropdown<br><table border="1"> <tr><td>0</td><td>Incomplete</td></tr> <tr><td>1</td><td>Unverified</td></tr> <tr><td>2</td><td>Complete</td></tr> </table>                                                                                                                                                                               | 0 | Incomplete     | 1                  | Unverified          | 2         | Complete                 |   |            |                                |                   |           |          |
| 0                                                                                                                                                                                                | Incomplete                    |                                                                                                |                                                                                                                                                                                                                                                                                                                                          |   |                |                    |                     |           |                          |   |            |                                |                   |           |          |
| 1                                                                                                                                                                                                | Unverified                    |                                                                                                |                                                                                                                                                                                                                                                                                                                                          |   |                |                    |                     |           |                          |   |            |                                |                   |           |          |
| 2                                                                                                                                                                                                | Complete                      |                                                                                                |                                                                                                                                                                                                                                                                                                                                          |   |                |                    |                     |           |                          |   |            |                                |                   |           |          |
| Instrument: <b>Treatment of COVID-19</b> (treatment_of_covid19)  Enabled as survey <a href="#">^ Collapse</a> |                               |                                                                                                |                                                                                                                                                                                                                                                                                                                                          |   |                |                    |                     |           |                          |   |            |                                |                   |           |          |
| 58                                                                                                                                                                                               | chloroquin                    | Section Header: <i>Treatment</i><br>Hydroxychloroquine (Plaquenil) is useful to treat COVID-19 | radio (Matrix)<br><table border="1"> <tr><td>1</td><td>Strongly agree</td></tr> <tr><td>2</td><td>Agree</td></tr> <tr><td>3</td><td>Neutral</td></tr> <tr><td>4</td><td>Disagree</td></tr> <tr><td>5</td><td>Strongly disagree</td></tr> </table> Field Annotation: chloroquin                                                           | 1 | Strongly agree | 2                  | Agree               | 3         | Neutral                  | 4 | Disagree   | 5                              | Strongly disagree |           |          |
| 1                                                                                                                                                                                                | Strongly agree                |                                                                                                |                                                                                                                                                                                                                                                                                                                                          |   |                |                    |                     |           |                          |   |            |                                |                   |           |          |
| 2                                                                                                                                                                                                | Agree                         |                                                                                                |                                                                                                                                                                                                                                                                                                                                          |   |                |                    |                     |           |                          |   |            |                                |                   |           |          |
| 3                                                                                                                                                                                                | Neutral                       |                                                                                                |                                                                                                                                                                                                                                                                                                                                          |   |                |                    |                     |           |                          |   |            |                                |                   |           |          |
| 4                                                                                                                                                                                                | Disagree                      |                                                                                                |                                                                                                                                                                                                                                                                                                                                          |   |                |                    |                     |           |                          |   |            |                                |                   |           |          |
| 5                                                                                                                                                                                                | Strongly disagree             |                                                                                                |                                                                                                                                                                                                                                                                                                                                          |   |                |                    |                     |           |                          |   |            |                                |                   |           |          |
| 59                                                                                                                                                                                               | drug_trial                    | I am willing to participate in future drug trials for COVID-19                                 | radio (Matrix)<br><table border="1"> <tr><td>1</td><td>Strongly agree</td></tr> <tr><td>2</td><td>Agree</td></tr> <tr><td>3</td><td>Neutral</td></tr> <tr><td>4</td><td>Disagree</td></tr> <tr><td>5</td><td>Strongly disagree</td></tr> </table> Field Annotation: drug trial                                                           | 1 | Strongly agree | 2                  | Agree               | 3         | Neutral                  | 4 | Disagree   | 5                              | Strongly disagree |           |          |
| 1                                                                                                                                                                                                | Strongly agree                |                                                                                                |                                                                                                                                                                                                                                                                                                                                          |   |                |                    |                     |           |                          |   |            |                                |                   |           |          |
| 2                                                                                                                                                                                                | Agree                         |                                                                                                |                                                                                                                                                                                                                                                                                                                                          |   |                |                    |                     |           |                          |   |            |                                |                   |           |          |
| 3                                                                                                                                                                                                | Neutral                       |                                                                                                |                                                                                                                                                                                                                                                                                                                                          |   |                |                    |                     |           |                          |   |            |                                |                   |           |          |
| 4                                                                                                                                                                                                | Disagree                      |                                                                                                |                                                                                                                                                                                                                                                                                                                                          |   |                |                    |                     |           |                          |   |            |                                |                   |           |          |
| 5                                                                                                                                                                                                | Strongly disagree             |                                                                                                |                                                                                                                                                                                                                                                                                                                                          |   |                |                    |                     |           |                          |   |            |                                |                   |           |          |
