# Supplementary material for: Perceived Stress, Knowledge, and Preventive Behaviors in Indian versus US-based Participants During COVID-19: A Survey Study
Source: Frontiers journal article supplement (doi:10.3389/fpubh.2021.687864), 2021-09-13
Supplement: Data_Sheet_4.PDF [file Data_Sheet_4.PDF]

|    |                   |                                                                                           |                                                                                                                                                                                                                                                                                          |   |                |   |       |   |         |   |          |   |                   |
|----|-------------------|-------------------------------------------------------------------------------------------|------------------------------------------------------------------------------------------------------------------------------------------------------------------------------------------------------------------------------------------------------------------------------------------|---|----------------|---|-------|---|---------|---|----------|---|-------------------|
| 20 | sd                | <p>Section Header: <i>Prevention of Disease Spread</i></p> <p>Social distancing helps</p> | <p>radio (Matrix)</p> <table border="1"> <tr><td>1</td><td>Strongly agree</td></tr> <tr><td>2</td><td>Agree</td></tr> <tr><td>3</td><td>Neutral</td></tr> <tr><td>4</td><td>Disagree</td></tr> <tr><td>5</td><td>Strongly disagree</td></tr> </table> <p>Field Annotation: SD</p>        | 1 | Strongly agree | 2 | Agree | 3 | Neutral | 4 | Disagree | 5 | Strongly disagree |
| 1  | Strongly agree    |                                                                                           |                                                                                                                                                                                                                                                                                          |   |                |   |       |   |         |   |          |   |                   |
| 2  | Agree             |                                                                                           |                                                                                                                                                                                                                                                                                          |   |                |   |       |   |         |   |          |   |                   |
| 3  | Neutral           |                                                                                           |                                                                                                                                                                                                                                                                                          |   |                |   |       |   |         |   |          |   |                   |
| 4  | Disagree          |                                                                                           |                                                                                                                                                                                                                                                                                          |   |                |   |       |   |         |   |          |   |                   |
| 5  | Strongly disagree |                                                                                           |                                                                                                                                                                                                                                                                                          |   |                |   |       |   |         |   |          |   |                   |
| 21 | ld                | 'Lockdown' or 'stay at home' orders are justified                                         | <p>radio (Matrix)</p> <table border="1"> <tr><td>1</td><td>Strongly agree</td></tr> <tr><td>2</td><td>Agree</td></tr> <tr><td>3</td><td>Neutral</td></tr> <tr><td>4</td><td>Disagree</td></tr> <tr><td>5</td><td>Strongly disagree</td></tr> </table> <p>Field Annotation: LD</p>        | 1 | Strongly agree | 2 | Agree | 3 | Neutral | 4 | Disagree | 5 | Strongly disagree |
| 1  | Strongly agree    |                                                                                           |                                                                                                                                                                                                                                                                                          |   |                |   |       |   |         |   |          |   |                   |
| 2  | Agree             |                                                                                           |                                                                                                                                                                                                                                                                                          |   |                |   |       |   |         |   |          |   |                   |
| 3  | Neutral           |                                                                                           |                                                                                                                                                                                                                                                                                          |   |                |   |       |   |         |   |          |   |                   |
| 4  | Disagree          |                                                                                           |                                                                                                                                                                                                                                                                                          |   |                |   |       |   |         |   |          |   |                   |
| 5  | Strongly disagree |                                                                                           |                                                                                                                                                                                                                                                                                          |   |                |   |       |   |         |   |          |   |                   |
| 22 | hw                | 'Handwash for 20 seconds' whenever needed, is useful                                      | <p>radio (Matrix)</p> <table border="1"> <tr><td>1</td><td>Strongly agree</td></tr> <tr><td>2</td><td>Agree</td></tr> <tr><td>3</td><td>Neutral</td></tr> <tr><td>4</td><td>Disagree</td></tr> <tr><td>5</td><td>Strongly disagree</td></tr> </table> <p>Field Annotation: HW</p>        | 1 | Strongly agree | 2 | Agree | 3 | Neutral | 4 | Disagree | 5 | Strongly disagree |
| 1  | Strongly agree    |                                                                                           |                                                                                                                                                                                                                                                                                          |   |                |   |       |   |         |   |          |   |                   |
| 2  | Agree             |                                                                                           |                                                                                                                                                                                                                                                                                          |   |                |   |       |   |         |   |          |   |                   |
| 3  | Neutral           |                                                                                           |                                                                                                                                                                                                                                                                                          |   |                |   |       |   |         |   |          |   |                   |
| 4  | Disagree          |                                                                                           |                                                                                                                                                                                                                                                                                          |   |                |   |       |   |         |   |          |   |                   |
| 5  | Strongly disagree |                                                                                           |                                                                                                                                                                                                                                                                                          |   |                |   |       |   |         |   |          |   |                   |
| 23 | fm                | 'Face mask' in public should be mandatory                                                 | <p>radio (Matrix)</p> <table border="1"> <tr><td>1</td><td>Strongly agree</td></tr> <tr><td>2</td><td>Agree</td></tr> <tr><td>3</td><td>Neutral</td></tr> <tr><td>4</td><td>Disagree</td></tr> <tr><td>5</td><td>Strongly disagree</td></tr> </table> <p>Field Annotation: FM</p>        | 1 | Strongly agree | 2 | Agree | 3 | Neutral | 4 | Disagree | 5 | Strongly disagree |
| 1  | Strongly agree    |                                                                                           |                                                                                                                                                                                                                                                                                          |   |                |   |       |   |         |   |          |   |                   |
| 2  | Agree             |                                                                                           |                                                                                                                                                                                                                                                                                          |   |                |   |       |   |         |   |          |   |                   |
| 3  | Neutral           |                                                                                           |                                                                                                                                                                                                                                                                                          |   |                |   |       |   |         |   |          |   |                   |
| 4  | Disagree          |                                                                                           |                                                                                                                                                                                                                                                                                          |   |                |   |       |   |         |   |          |   |                   |
| 5  | Strongly disagree |                                                                                           |                                                                                                                                                                                                                                                                                          |   |                |   |       |   |         |   |          |   |                   |
| 24 | er                | One should go to Emergency/doctor immediately if he/she has symptoms like COVID-19        | <p>radio (Matrix)</p> <table border="1"> <tr><td>1</td><td>Strongly agree</td></tr> <tr><td>2</td><td>Agree</td></tr> <tr><td>3</td><td>Neutral</td></tr> <tr><td>4</td><td>Disagree</td></tr> <tr><td>5</td><td>Strongly disagree</td></tr> </table> <p>Field Annotation: ER</p>        | 1 | Strongly agree | 2 | Agree | 3 | Neutral | 4 | Disagree | 5 | Strongly disagree |
| 1  | Strongly agree    |                                                                                           |                                                                                                                                                                                                                                                                                          |   |                |   |       |   |         |   |          |   |                   |
| 2  | Agree             |                                                                                           |                                                                                                                                                                                                                                                                                          |   |                |   |       |   |         |   |          |   |                   |
| 3  | Neutral           |                                                                                           |                                                                                                                                                                                                                                                                                          |   |                |   |       |   |         |   |          |   |                   |
| 4  | Disagree          |                                                                                           |                                                                                                                                                                                                                                                                                          |   |                |   |       |   |         |   |          |   |                   |
| 5  | Strongly disagree |                                                                                           |                                                                                                                                                                                                                                                                                          |   |                |   |       |   |         |   |          |   |                   |
| 25 | reopening         | Reopening of your state is a right decision                                               | <p>radio (Matrix)</p> <table border="1"> <tr><td>1</td><td>Strongly agree</td></tr> <tr><td>2</td><td>Agree</td></tr> <tr><td>3</td><td>Neutral</td></tr> <tr><td>4</td><td>Disagree</td></tr> <tr><td>5</td><td>Strongly disagree</td></tr> </table> <p>Field Annotation: reopening</p> | 1 | Strongly agree | 2 | Agree | 3 | Neutral | 4 | Disagree | 5 | Strongly disagree |
| 1  | Strongly agree    |                                                                                           |                                                                                                                                                                                                                                                                                          |   |                |   |       |   |         |   |          |   |                   |
| 2  | Agree             |                                                                                           |                                                                                                                                                                                                                                                                                          |   |                |   |       |   |         |   |          |   |                   |
| 3  | Neutral           |                                                                                           |                                                                                                                                                                                                                                                                                          |   |                |   |       |   |         |   |          |   |                   |
| 4  | Disagree          |                                                                                           |                                                                                                                                                                                                                                                                                          |   |                |   |       |   |         |   |          |   |                   |
| 5  | Strongly disagree |                                                                                           |                                                                                                                                                                                                                                                                                          |   |                |   |       |   |         |   |          |   |                   |
